# Supplementary material for: Fate of Pup inside the Mycobacterium Proteasome Studied by in-Cell NMR
Source: PubMed Central journal article supplement (PMC3769308; doi:10.1371/journal.pone.0074576), 2013-09-10

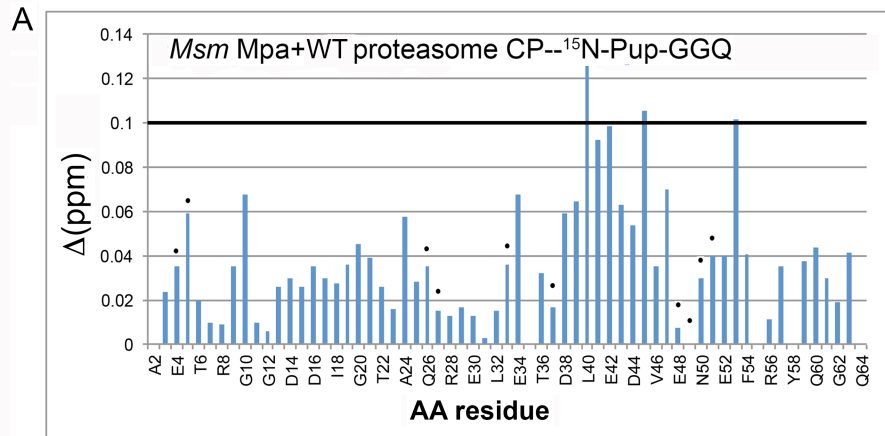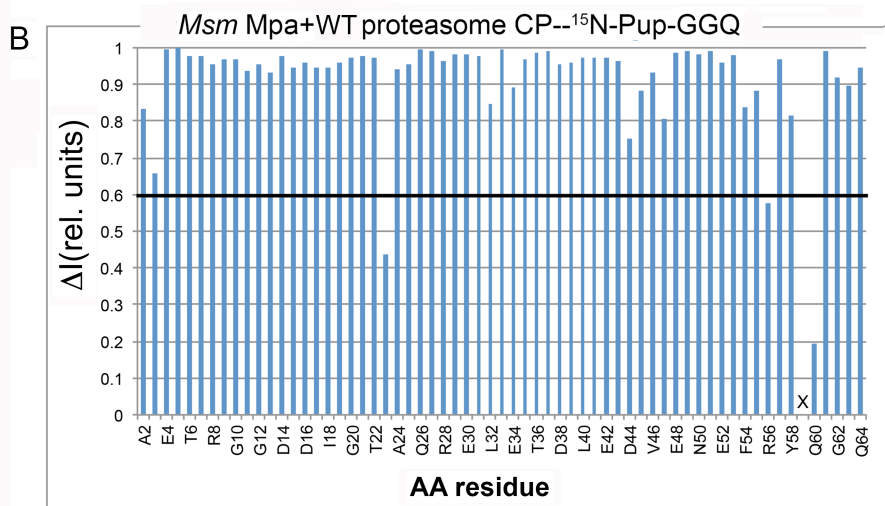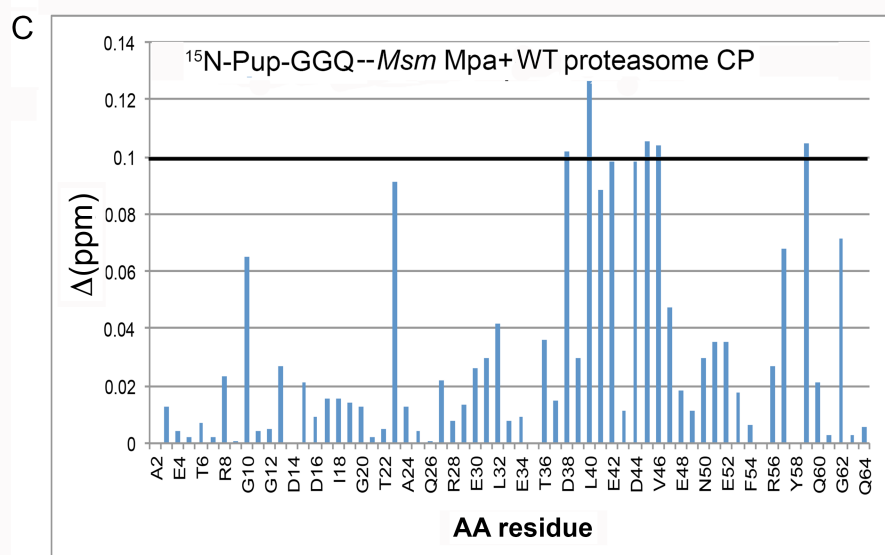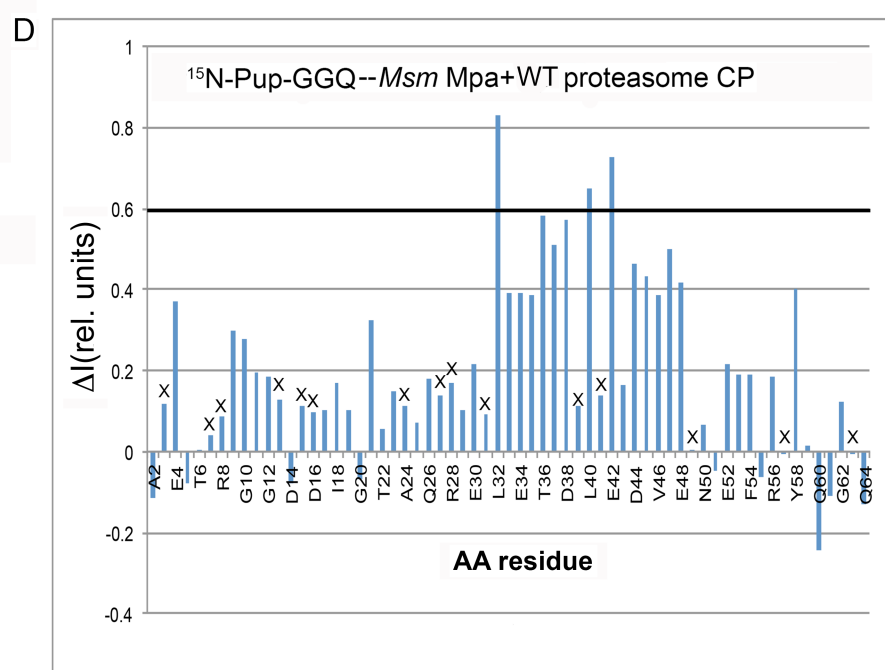

Supplement: pone.0074576.s003.pdf [file pone.0074576.s003.pdf]
